# Supplementary material
Source: PubMed Central journal article supplement (PMC5839939)
Supplement: NIHMS908082-supplement-1.pdf [file NIHMS908082-supplement-1.pdf]

# Supplementary Figure 1. A Global GFP-expressing Mouse Donates Labeled Cells to a Wild-type Parabiont

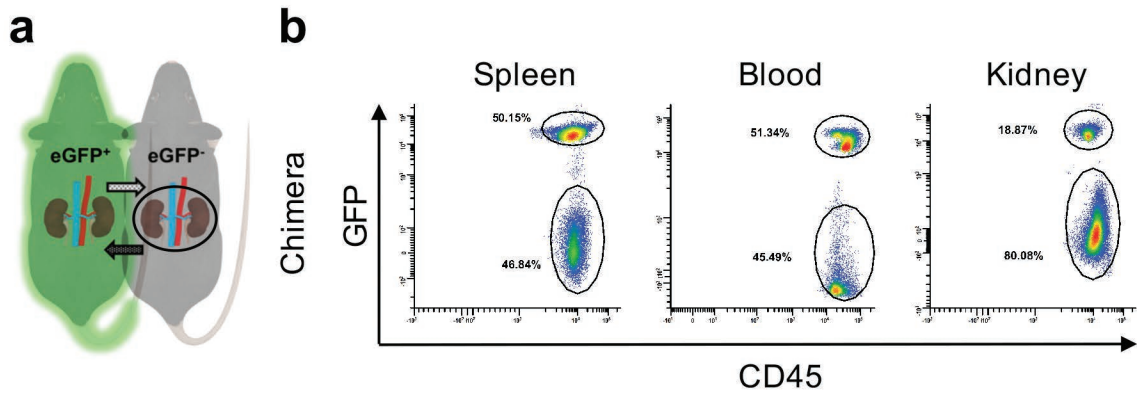

Parabiosis in eGFP mice for establishing immune chimerism in the kidney. **(a)** Schematic of eGFP parabionts. Circled kidneys represent sample used to generate histograms shown to the right. **(b)** Representative flow cytometry histograms of tissues from eGFP parabionts after 28 days of parabiosis.



## Supplementary Figure 3. Percent Chimerism of Myeloid Lineage Cells from eGFP Parabionts

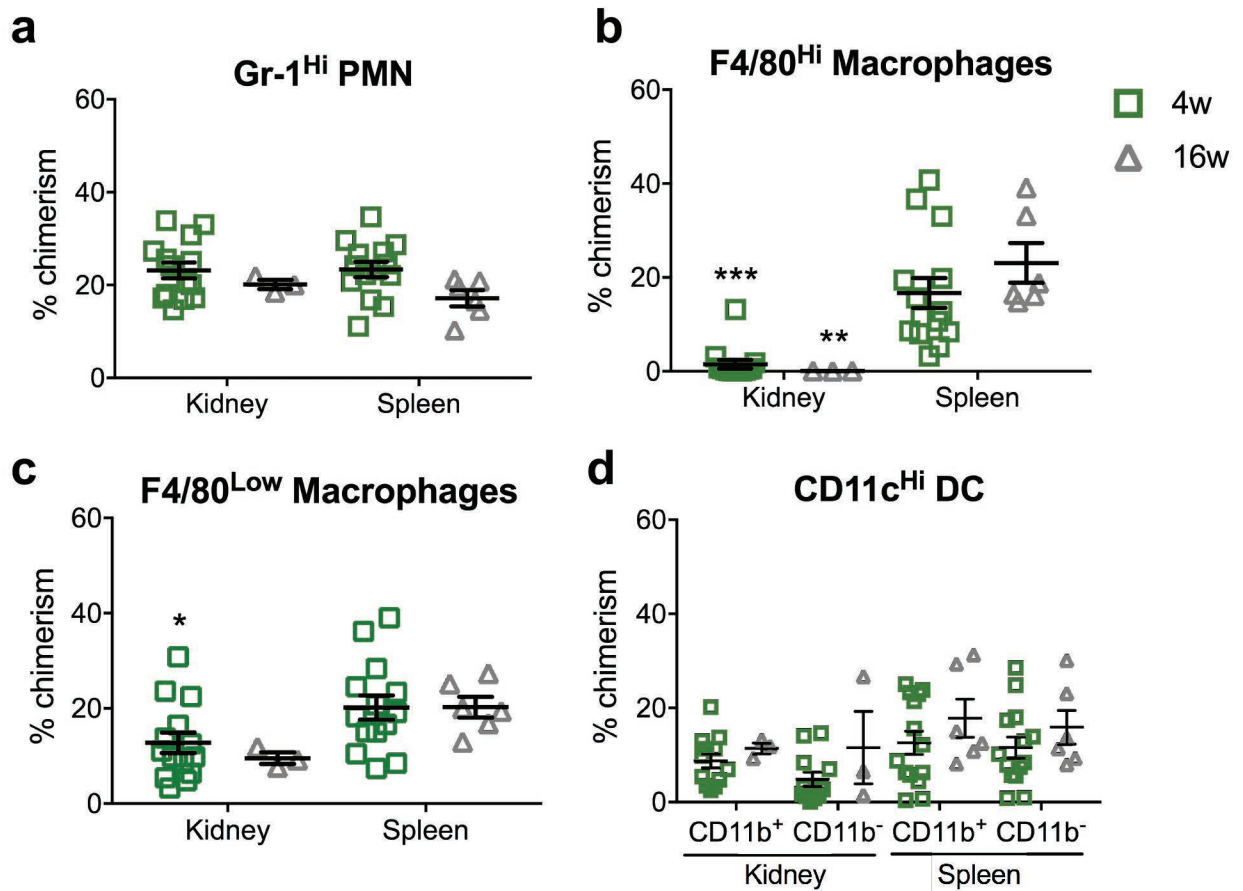

Percent chimerism for myeloid lineage cells from kidney, spleen, and blood of eGFP parabionts. Quantification of percent chimerism for (a) PMN, (b) F4/80<sup>Hi</sup> macrophages, (c) F4/80<sup>Low</sup> macrophages, and (d) CD11b<sup>+</sup> and CD11b<sup>-</sup> DC. Mean  $\pm$  SEM, n = 12 for CD45-4 week (6 pairs), n = 6 for CD45-16 week (3 pairs), n = 14 for eGFP-4 week (7 pairs), and n = 3 for eGFP-16 week (3 pairs). Two-way ANOVA, Sidak's multiple comparisons test, comparing kidney versus spleen for each cell type at each time point, \* $p < 0.05$ , \*\* $p < 0.01$ , \*\*\* $p < 0.001$ , \*\*\*\* $p < 0.0001$ . ND = no data.

# Supplementary Figure 4. Percent Chimerism of Lymphoid Lineage Cells from eGFP Parabionts

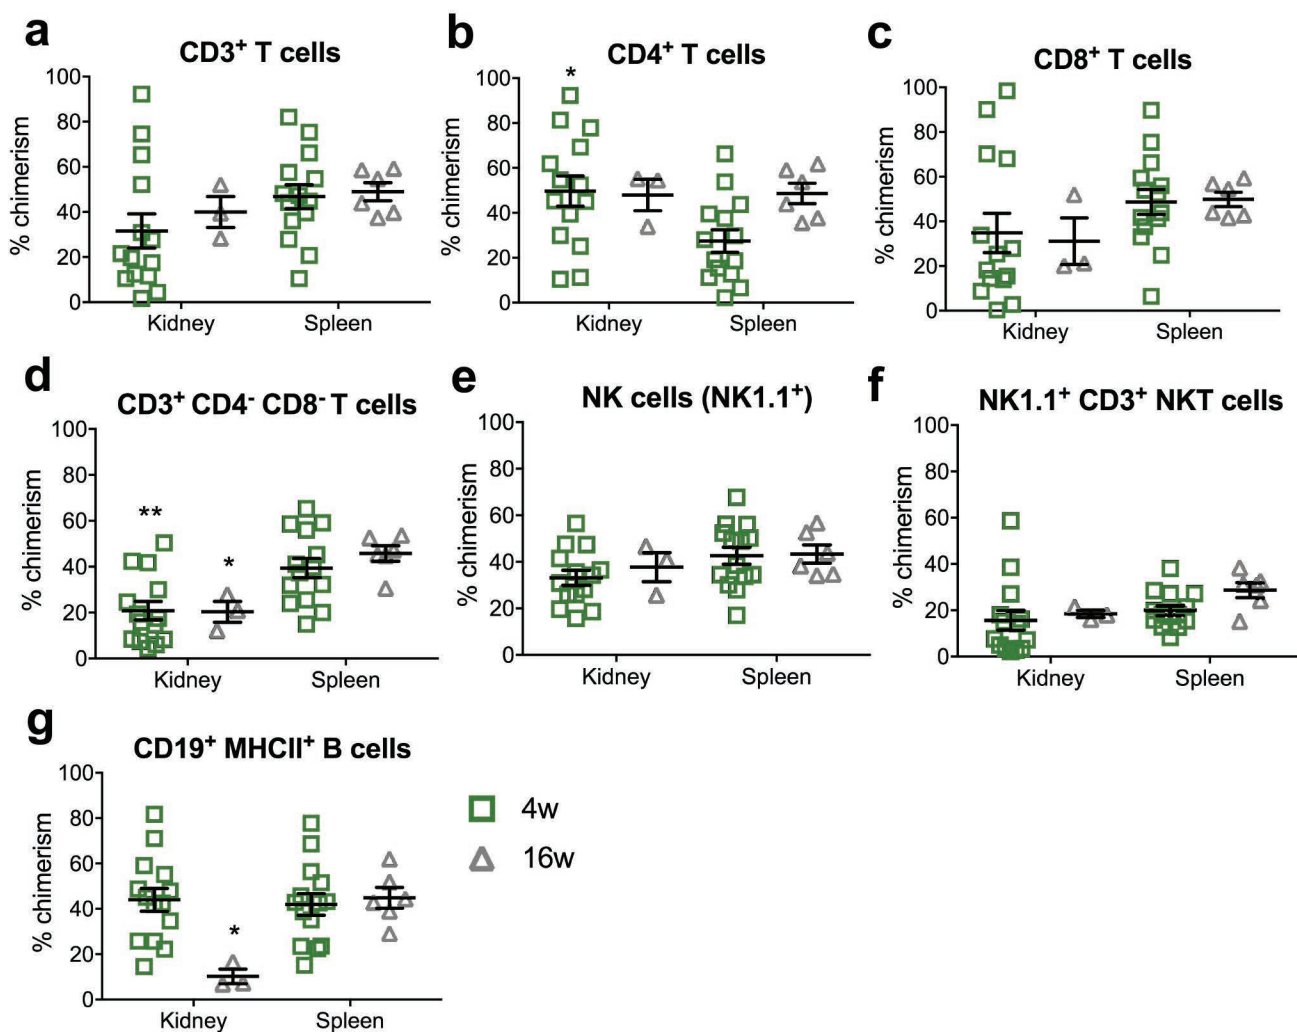

Percent chimerism for lymphoid lineage cells from kidney and spleen of eGFP parabionts. Quantification of percent chimerism for (a) T cells, (b) CD4, (c) CD8, (d) double negative T lymphocytes, (e) NK cells, (f) NKT cells, and (g) B cells. Mean  $\pm$  SEM, n = 14 for 4w and n = 3-6 for 16w. Two-way ANOVA, Sidak's test for multiple comparisons, comparing kidney versus spleen for each cell type at each time point, \* $p < 0.05$ , \*\* $p < 0.01$ . NK = natural killer.
